# Supplementary material for: Reactive oxygen species (ROS) formation ability and stability of small copper (Cu) nanoparticles (NPs)
Source: Royal Society of Chemistry journal article supplement (doi:10.1039/c6ra16599k), 2016-01-01
Supplement: c6ra16599k1.pdf [file c6ra16599k1.pdf]

## ***Supporting Information***

### **Reactive oxygen species (ROS) formation ability and stability of small Copper (Cu) nanoparticles (NPs)**

*Anda Šulce<sup>1</sup>, Felix Bulke<sup>2</sup>, Marco Schowalter<sup>3</sup>, Andreas Rosenauer<sup>3</sup>, Ralf Dringen<sup>2</sup>, and Sebastian Kunz<sup>\*1</sup>*

<sup>1</sup> Institute of Applied and Physical Chemistry (IAPC), Faculty 2 (Biology/Chemistry) and Centre for Environmental Research and Sustainable Technology, University of Bremen, Leobenerstraße, 28359 Bremen, Germany

<sup>2</sup> Centre for Biomolecular Interactions Bremen, Faculty 2 (Biology/Chemistry) and Centre for Environmental Research and Sustainable Technology, University of Bremen, Bremen, Germany

<sup>3</sup> Institute of solid state physics, Faculty 1, University of Bremen, Otto-Hahn-Allee 1, 28359 Bremen, Germany

\* Corresponding Author:

Dr. Sebastian Kunz

University of Bremen

Institute of Applied and Physical Chemistry (IAPC)

D-28359 Bremen

Tel: +49-421-218 63187

eMail: SebKunz@uni-bremen.de

## 1. TEM image of Cu NPs before and after binding of CYS with according particle size distributions

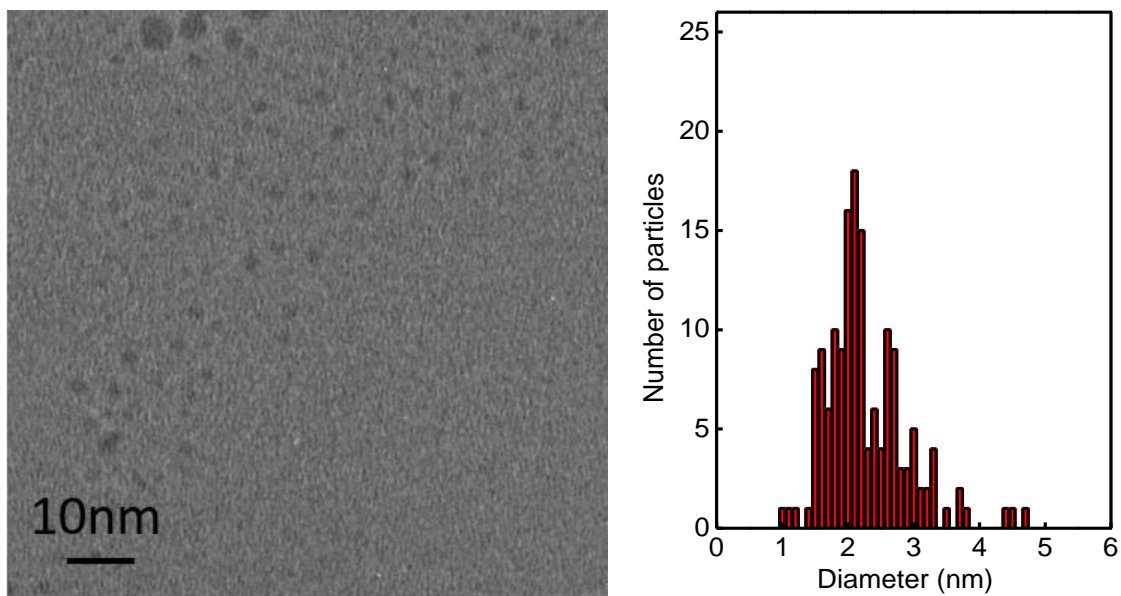

**Figure S1.** TEM image (left) and size distribution (right) of as prepared Cu NPs. NPs are visible as black spots. The mean diameter of NPs determined from the particle size distribution is  $2.3 \pm 0.6$  nm.

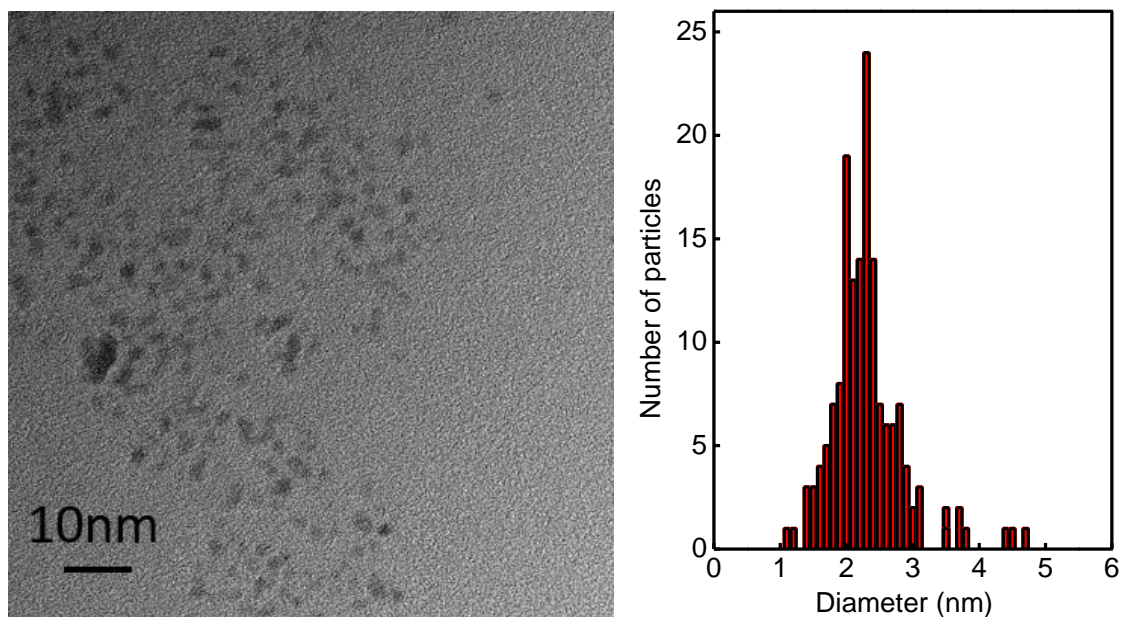

**Figure S2.** TEM image (left) and size distribution (right) of CYS-Cu NPs. NPs are visible as black spots. The mean diameter of NPs determined from the particle size distribution is  $2.2 \pm 0.4$  nm.

## 2. Time dependent changes of aqueous CYS-Cu NP dispersion

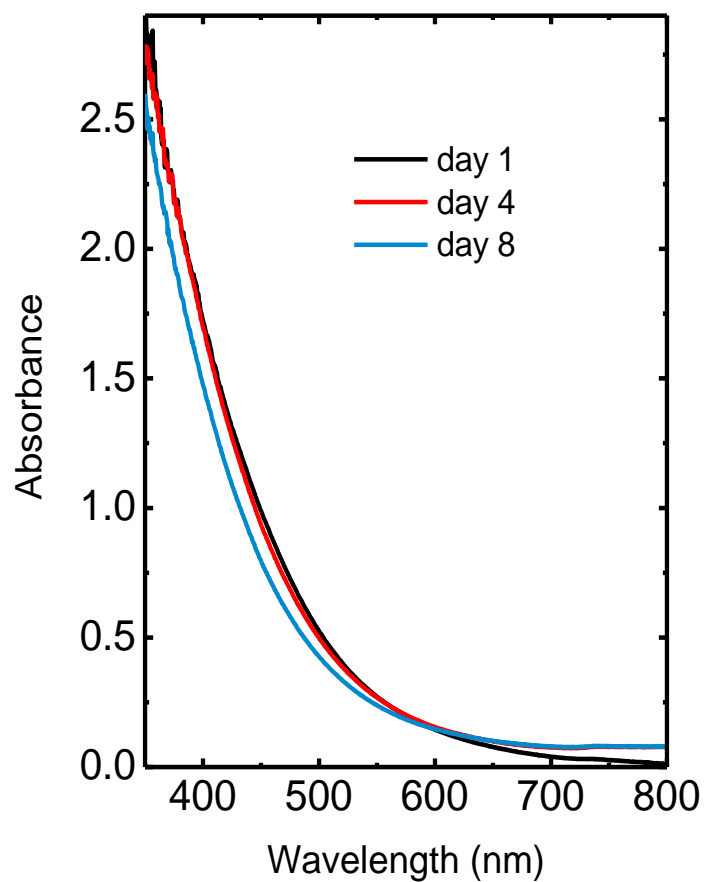

**Figure S3.** UV-vis spectra of a CYS-Cu NP dispersion after storage. After four days the small changes in the absorption above 600 nm appeared. After eight days a considerable deviation compared to the spectra after one and four days below 600 nm is visible.

### 3. Additional experimental data of ROS formation test experiments

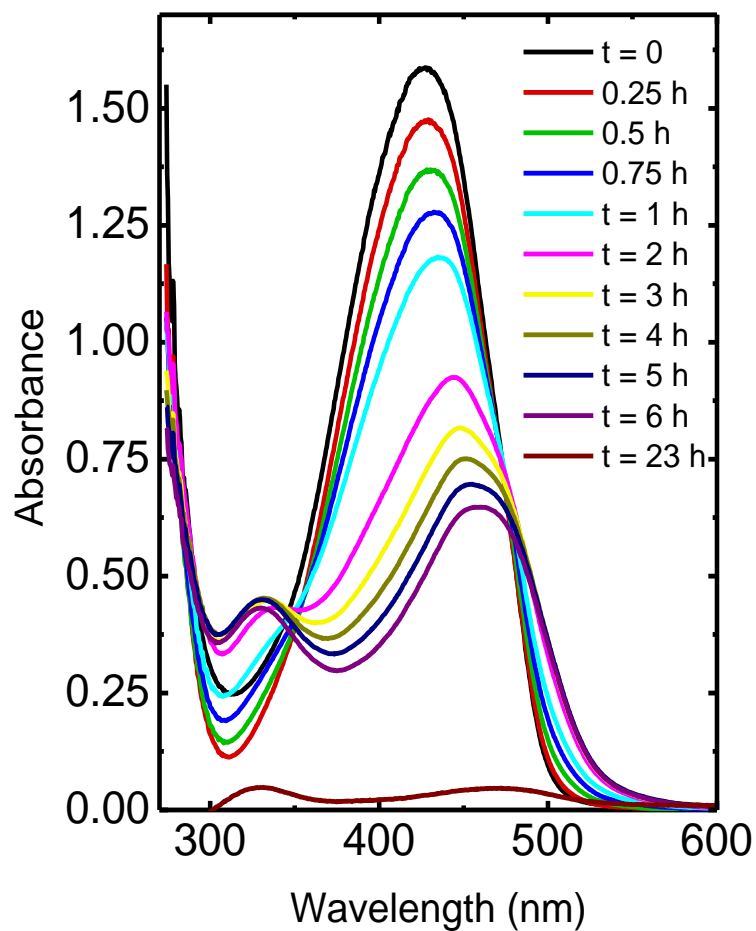

**Figure S4.** UV-vis spectral change of tartrazine monitored during its degradation in the presence of  $7.83 \cdot 10^{-2}$  mM GSH-Cu NPs and 0.22 M  $H_2O_2$ . In the first hour the absorption maximum at 429 nm decreases continuously. After 2 hours the maximum does not merely decrease, but shifts to higher wavelengths indicating that additional degradation reaction steps may take place.

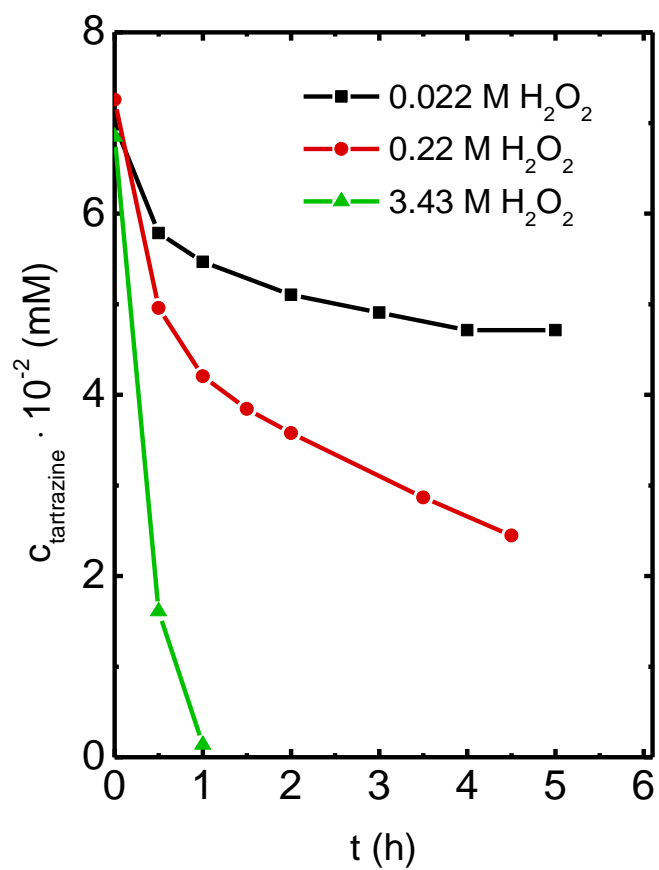

**Figure S5.** In order to test the effect of the  $\text{H}_2\text{O}_2$  concentration on the rate of tartrazine degradation, a single experiment was performed with CYS-Cu NPs and the absorption maximum at 429 nm was analyzed. The degradation rate increases as the  $\text{H}_2\text{O}_2$  concentration is increased.

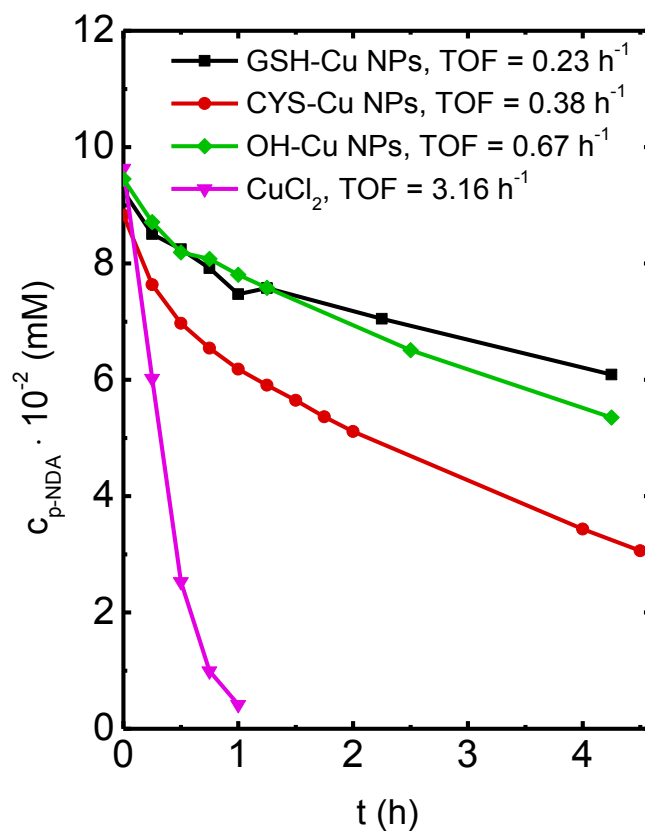

**Figure S6.** Bleaching of p-NDA by different ligand-functionalized Cu NPs and  $\text{Cu}^{2+}$  in the presence of 0.11 M hydrogen peroxide. The absorbance maximum of p-NDA at 440 nm was taken as a measure for its degradation.  $c(\text{CYS-Cu NPs}) = 3.40 \cdot 10^{-2}$  mM,  $c(\text{GSH-Cu NPs}) = 3.28 \cdot 10^{-2}$  mM,  $c(\text{CuCl}_2) = 7.83 \cdot 10^{-2}$  mM,  $c(\text{OH-Cu NPs}) = 1.44 \cdot 10^{-2}$  mM. GSH-Cu NPs show a lower activity than CYS-Cu NPs. OH-Cu NPs exhibit the highest activity.  $\text{Cu}^{2+}$  is significantly more active than all Cu NP samples.

## Supplementary data of stability studies

Standard redox potentials:<sup>[1]</sup>

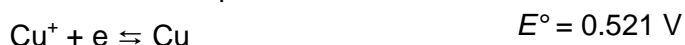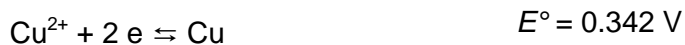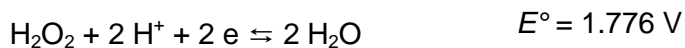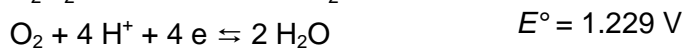

Based on the standard redox potentials the  $E^\circ$  values for the oxidation of Cu by  $\text{O}_2$  and  $\text{H}_2\text{O}_2$  can be calculated:

$\text{O}_2$  induced redox reactions of Cu:

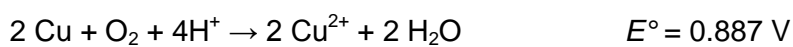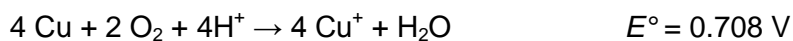

$\text{H}_2\text{O}_2$  induced redox reactions of Cu:<sup>[2]</sup>

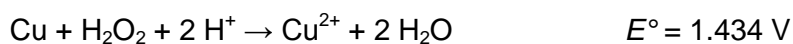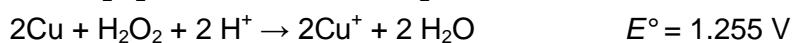

In the presence of  $\text{O}_2$  or  $\text{H}_2\text{O}_2$  the oxidation of copper is thermodynamically favored. Furthermore, the oxidation of Cu to  $\text{Cu}^{2+}$  exhibits a stronger driving force than the oxidation of Cu to  $\text{Cu}^+$ .

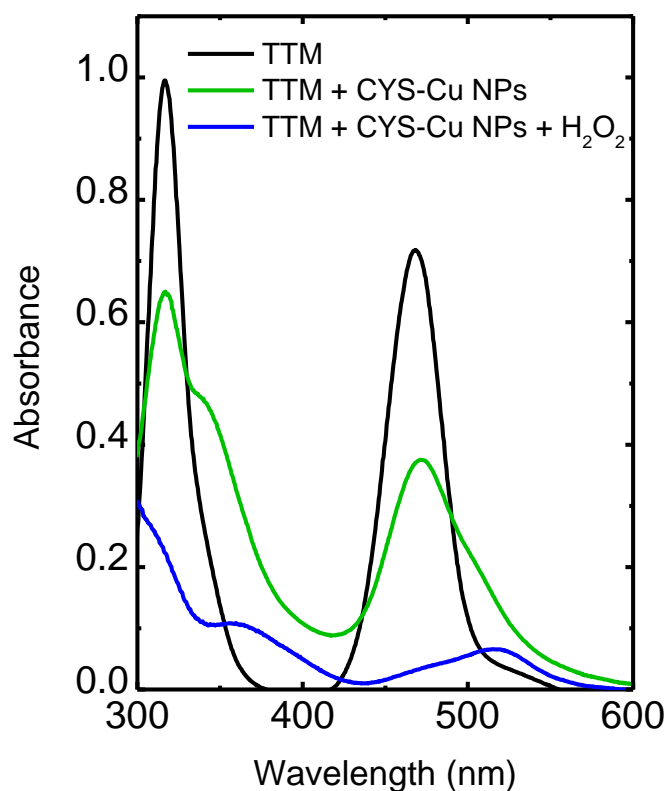

**Figure S7.** Release of  $\text{Cu}^{2+}$  ions from CYS-Cu NPs ( $3.40 \cdot 10^{-2}$  mM) in phosphate buffer in the presence (blue) and in the absence (green) of  $\text{H}_2\text{O}_2$  (0.22 M), tested with TTM (black) as a complexing agent. The decrease of the absorbance at 470 nm indicates the consumption of TTM for the formation of  $\text{Cu}^{2+}$ -TTM-complex.  $\text{Cu}^{2+}$  ions are present already in the absence of  $\text{H}_2\text{O}_2$  as evident from comparison of the black and the green spectrum. If hydrogen peroxide is added, additional  $\text{Cu}^{2+}$  ions are leached (compare green spectrum to blue). The instability of TTM in the presence of  $\text{H}_2\text{O}_2$  may have an influence on the results. The TTM- $\text{Cu}^{2+}$ -complex was however found to be stable for hours, as evident from tartrazine degradation experiments performed in the presence of TTM (see Fig. 5 in the manuscript).



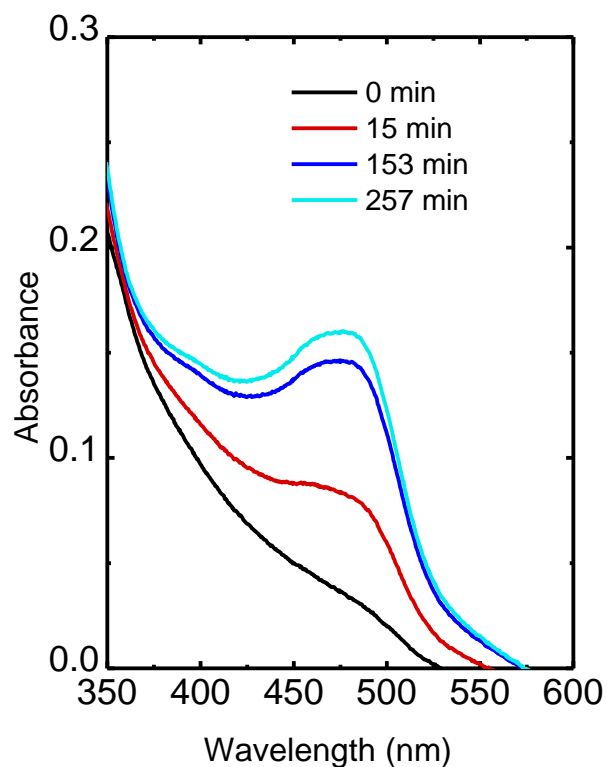

**Figure S8.** CYS-Cu NPs in phosphate buffer. The absorption band appearing above 470 nm is related to the formation of  $\text{Cu}^+$ -BCS-complexes. This process occurs slowly compared to the formation of TTM- $\text{Cu}^{2+}$ -complex (see Fig. S7).

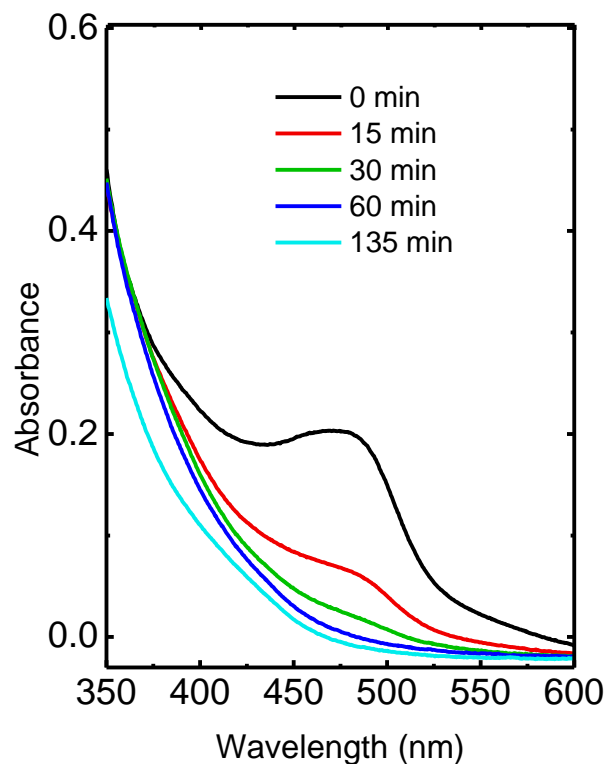

**Figure S9.** Instability of  $\text{Cu}^+$ -BCS-complex (from GSH-Cu NPs) in the presence of 0.11 M  $\text{H}_2\text{O}_2$ . The rapid decrease of the absorbance indicates the decomposition of the complex.

## References

- [1] W. M. Haynes, *Handbook of Chemistry and Physics*, Vol. 9, 1st Edition, **2010-2011**.
- [2] W. He, Y. Liu, W. G. Wamer, J.-J. Yin, Electron spin resonance spectroscopy for the study of nanomaterial-mediated generation of reactive oxygen species, *Journal of food and drug analysis* **2014**, 22, 49–63.
